# Supplementary material for: Phytochemistry by design: a case study of the chemical composition of Ocotea guianensis optimized extracts focused on untargeted metabolomics analysis
Source: Royal Society of Chemistry journal article supplement (doi:10.1039/c9ra10436d), 2020-01-01

## Supplementary material

Figure S1. Schematic chart of experimental section

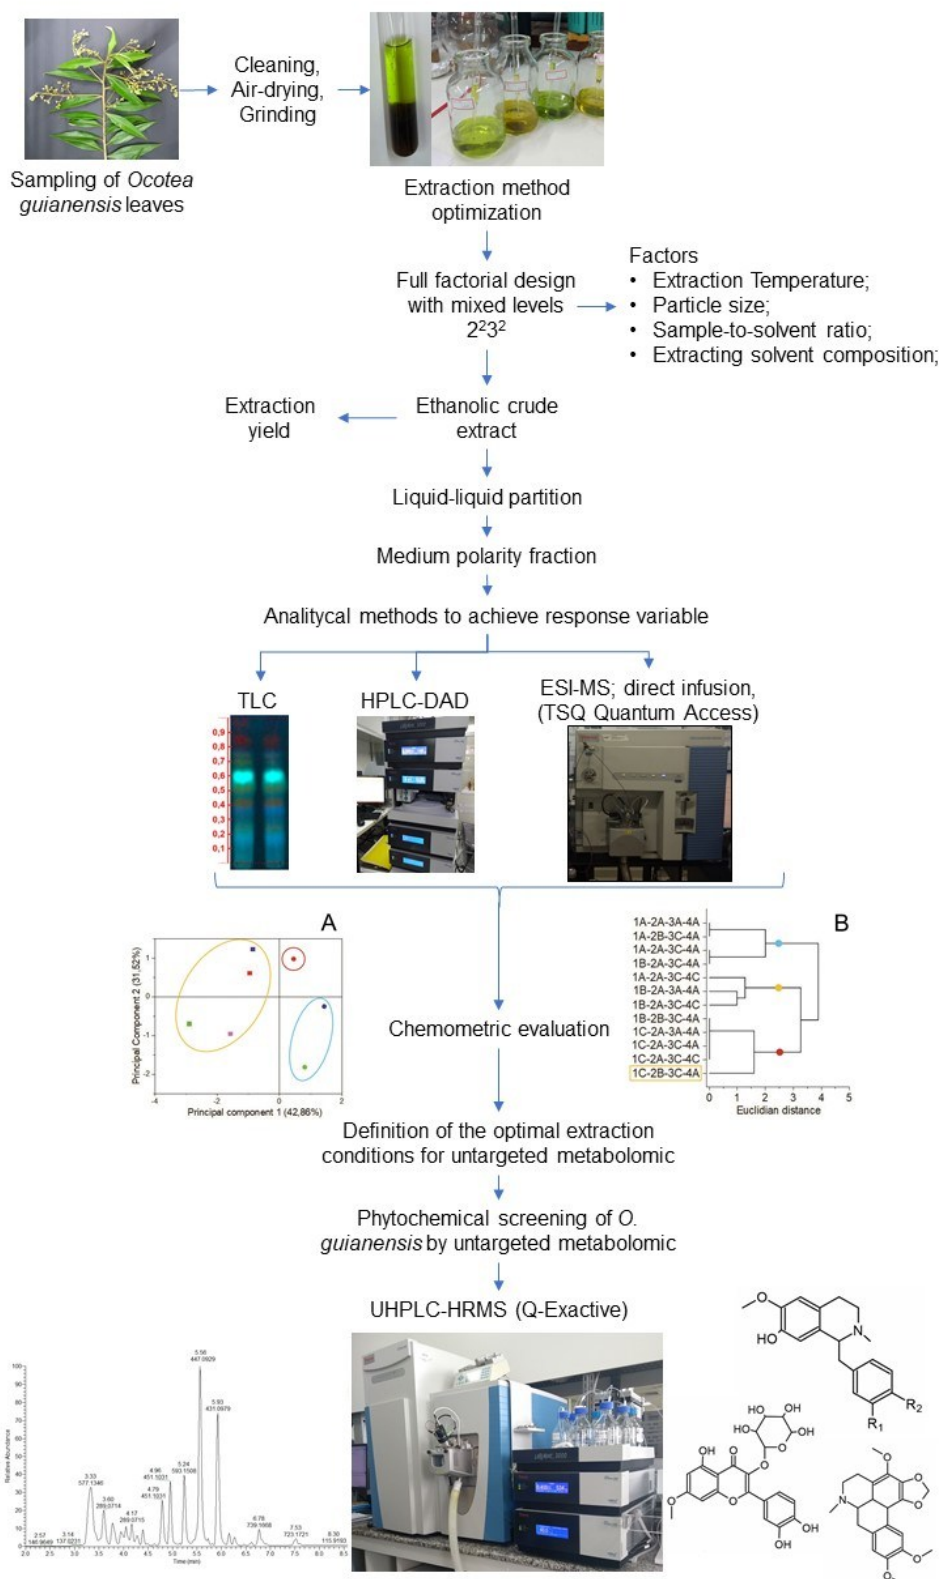

Board S1. Instrumental details of high performance liquid chromatography tandem diode array detector analysis (used during the optimization of the extraction method)

| <b>Dionex Ultimate 3000 (Thermo Scientific, Bremen, Germany)</b> |                                                              |                |
|------------------------------------------------------------------|--------------------------------------------------------------|----------------|
| Stationary phase                                                 | C18, 250 x 4.6 mm, 5.0 $\mu$ m Shim-Pack ODS(H) Shimadzu®    |                |
| Oven Temperature (°C)                                            | 40                                                           |                |
| Injection system temperature (°C)                                | 40                                                           |                |
| Flow rate (mL min <sup>-1</sup> )                                | 1.0                                                          |                |
| Injection volume ( $\mu$ L)                                      | 20                                                           |                |
| Sample concentration (mg mL <sup>-1</sup> ) in methanol          | 1.0                                                          |                |
| Mobile phase                                                     | Solvent A: 0.05% formic acid<br>Solvent B: 100% acetonitrile |                |
| Elution gradient                                                 | Time (min.)                                                  | % of Solvent B |
|                                                                  | 0                                                            | 5              |
|                                                                  | 5                                                            | 5              |
|                                                                  | 32.5                                                         | 70             |
|                                                                  | 33.5                                                         | 70             |
|                                                                  | 43                                                           | 100            |
|                                                                  | 53                                                           | 100            |
| 63                                                               | 0                                                            |                |
| DAD wavelength detection (nm)                                    | 300                                                          |                |

Board S2. Instrumental details of mass spectrometric analysis by direct injection in full scan mode (used during the optimization of the extraction method)

| <b>TSQ Quantum Access (Thermo Scientific, Bremen, Germany)</b> |                                                    |
|----------------------------------------------------------------|----------------------------------------------------|
| Detector                                                       | Triple quadrupole                                  |
| <i>m/z</i> range (Da)                                          | 100 - 1000                                         |
| Acquisition mode                                               | Full scan (MS <sup>1</sup> )<br>Average of 10 scan |
| Isolation window                                               | 4.0                                                |
| Resolution (FHWM)                                              | 75,000                                             |
| Ionization source                                              | ESI                                                |
| Ionization modes                                               | Positive and negative                              |
| Spray voltage (kV)                                             | 3.0 (negative mode)<br>4.5 (positive mode)         |
| Sheath gas flow (arb)                                          | 35                                                 |
| Sweep gas flow (arb)                                           | 0.0                                                |
| Auxiliary gas flow (arb)                                       | 15                                                 |
| Nebulizing gas flow (L min <sup>-1</sup> )                     | 2.5                                                |
| Nebulizing gas                                                 | N <sub>2</sub>                                     |
| Capillary Temperature (°C)                                     | 350                                                |
| Source temperature (°C)                                        | 250                                                |
| Collision energy (eV)                                          | 30                                                 |

Board S3. Instrumental details of ultra high performance liquid chromatography tandem high resolution mass spectrometry analysis (used in the phytochemical screening of *Ocotea delicata*)

|                               |                                                                                                                                                |
|-------------------------------|------------------------------------------------------------------------------------------------------------------------------------------------|
| Liquid chromatograph          | Dionex Ultimate 3000 (Thermo Scientific, Bremen, Germany)                                                                                      |
| Mass spectrometer             | Q-Exactive (ThermoFisher Scientific, Bremen, Germany)                                                                                          |
| Detector                      | Hybrid quadrupole-orbitrap mass                                                                                                                |
| Ionization source             | ESI                                                                                                                                            |
| Acquisition mode              | MS <sup>1</sup> and MS <sup>2</sup><br>Data Dependent analysis (DDA) with “TopN” algorithm set to 5 precursors for MS <sup>2</sup> experiments |
| <i>m/z</i> range (Da)         | 100 – 900                                                                                                                                      |
| Ionization modes              | Positive and negative                                                                                                                          |
| Spray voltage (kV)            | 2.9 (negative mode)<br>3.9 (positive mode)                                                                                                     |
| Sheath gas flow (arb)         | 60                                                                                                                                             |
| Sweep gas flow (arb)          | 0.0                                                                                                                                            |
| Auxiliary gas flow (arb)      | 20                                                                                                                                             |
| Capillary Temperature (°C)    | 380                                                                                                                                            |
| Source temperature (°C)       | 250                                                                                                                                            |
| Collision energy (eV)         | 30                                                                                                                                             |
| Resolution (FWHM)             | 70,000                                                                                                                                         |
| Mass error (ppm)              | 5.0                                                                                                                                            |
| Isolation window              | 4.0                                                                                                                                            |
| Mass spectrometer calibration | Xcalibur v3.0.63 Lock mass as “best” for polydimethylsiloxane                                                                                  |

MS<sup>2</sup> data for the suggestive identification of substances in the article “Phytochemistry by design: a case study of the chemical composition of *Ocotea guianensis* optimized extracts focused on untargeted metabolomics analysis”

- Chlorogenic acid

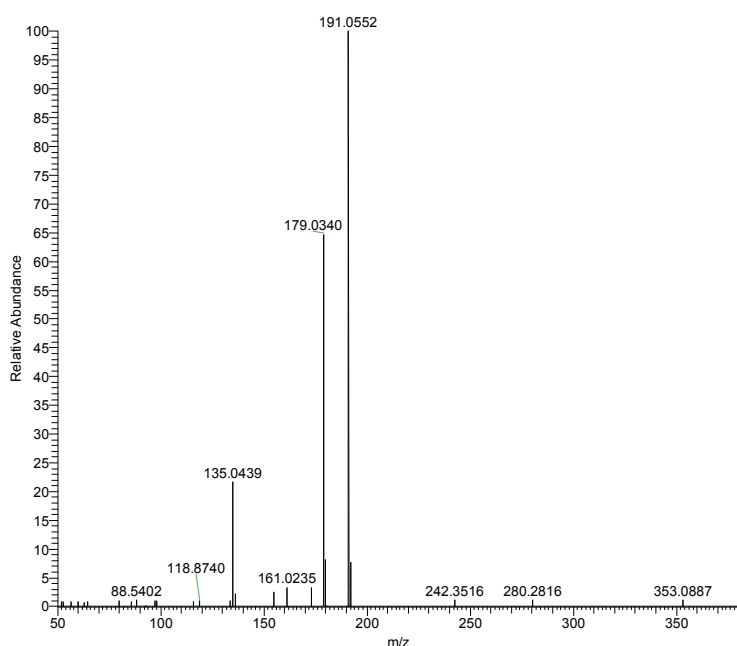

- Glycosylated derivative of catechin

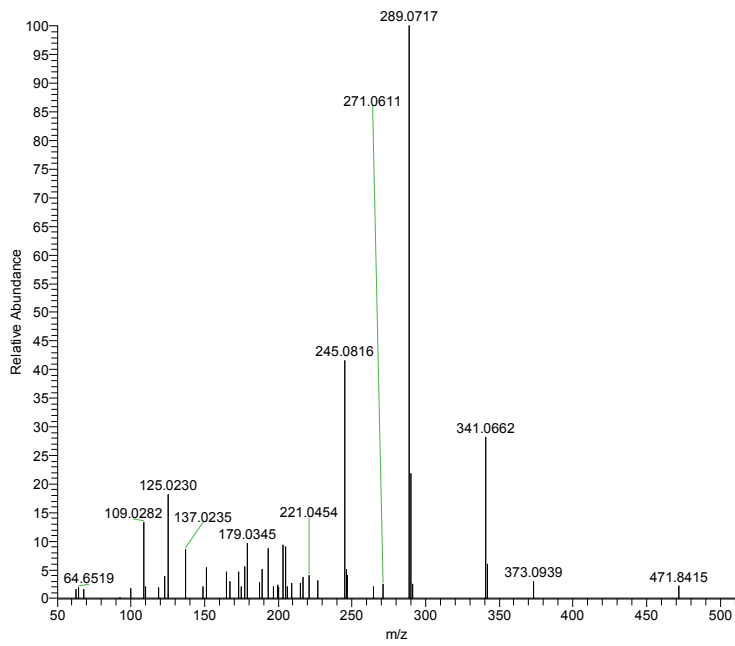

- Quinic acid

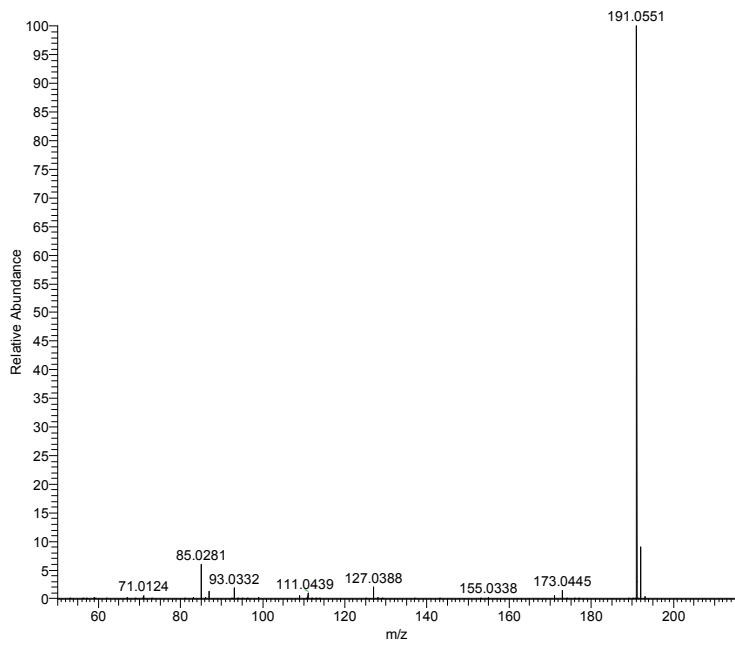

- Catechin

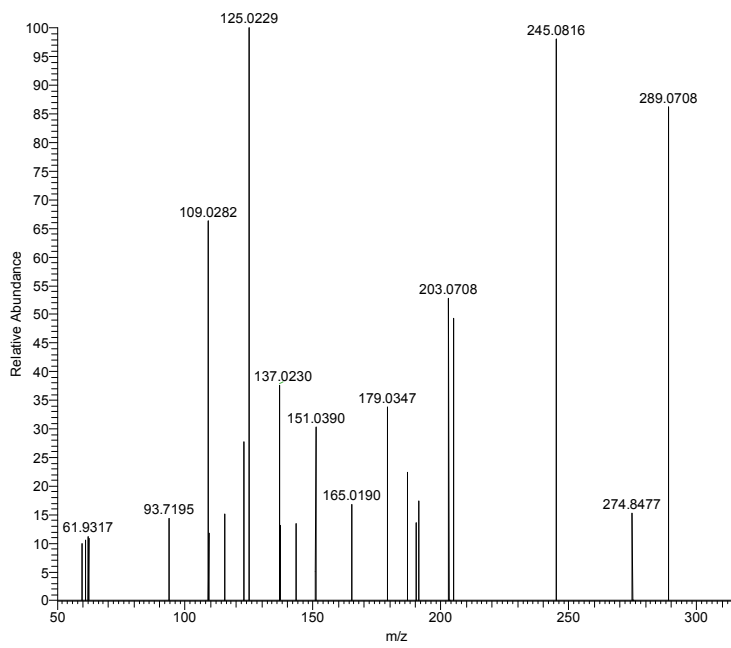

- Quercetin

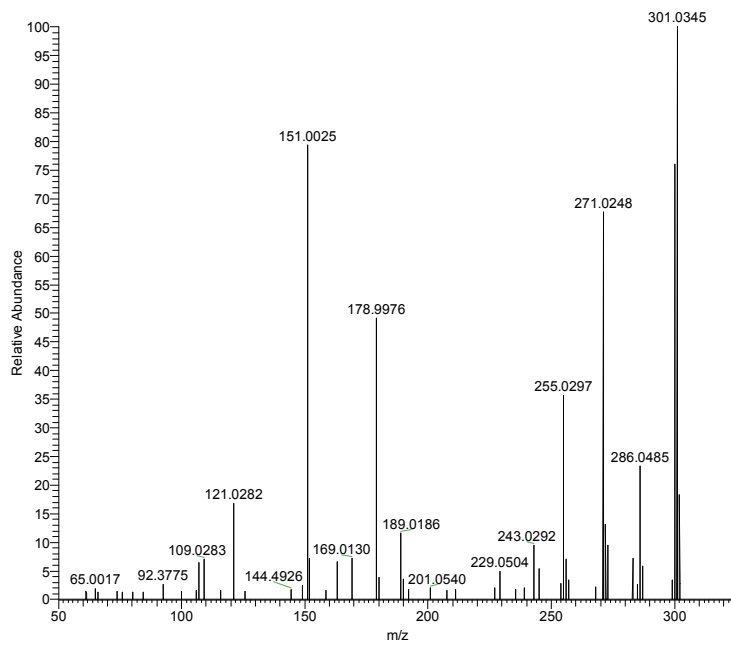

- Kaempferol

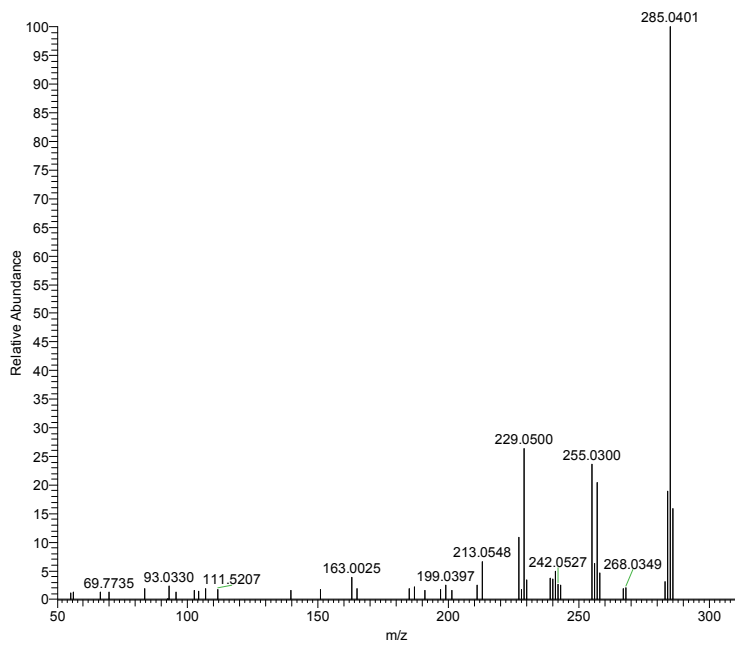

- Kaempferol-3-O-pentoside

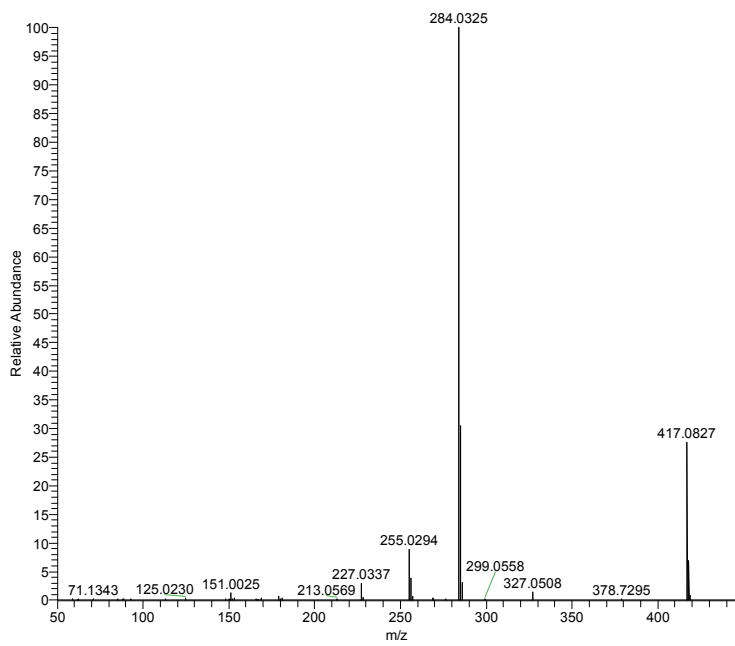

- Isorhamnetin derivate

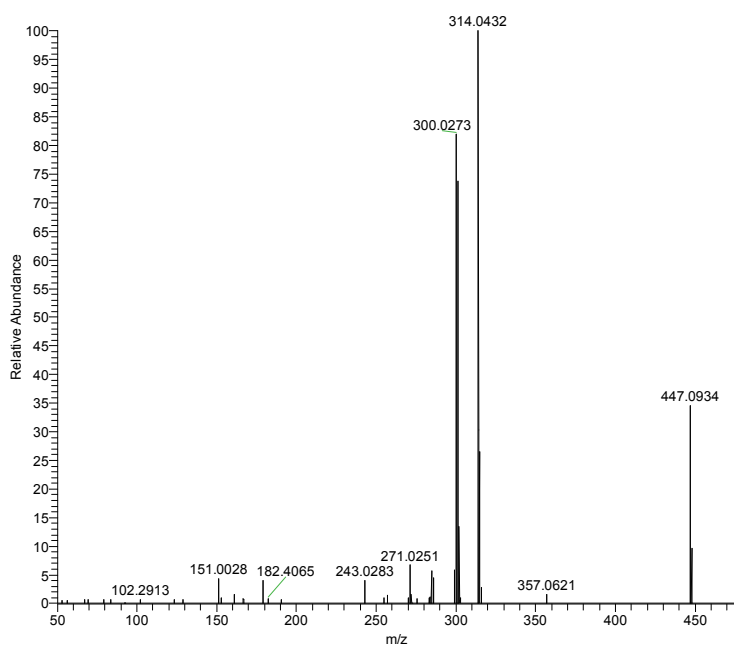

- Reticuline

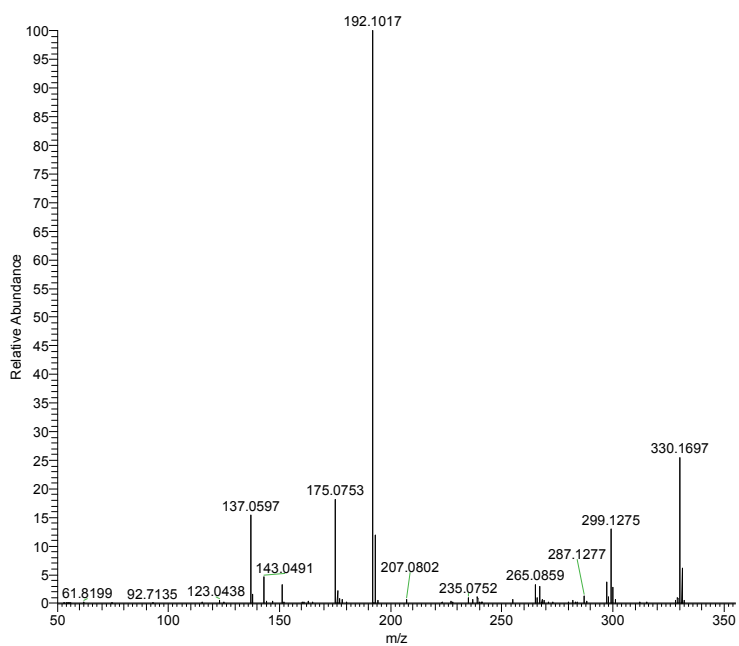

- Corydine/predicentrine
  - Retention time of 4.28 min

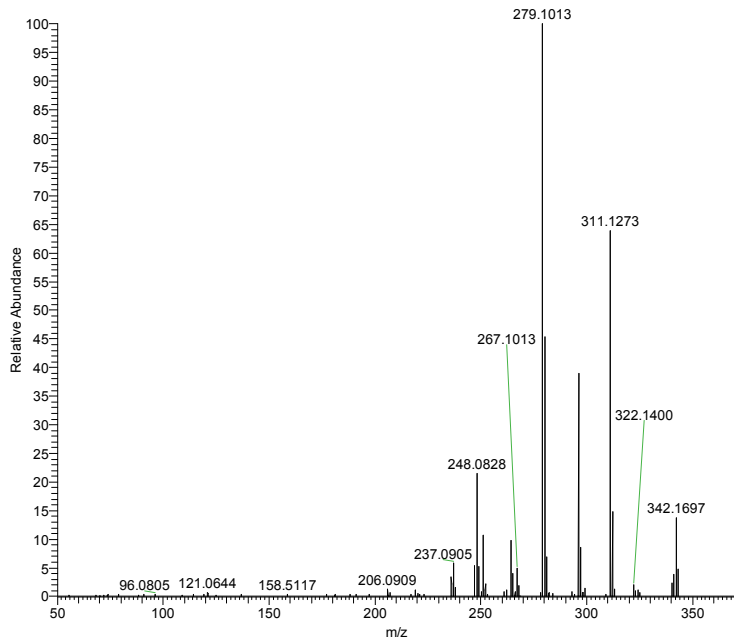

- Retention time of 4.56 min

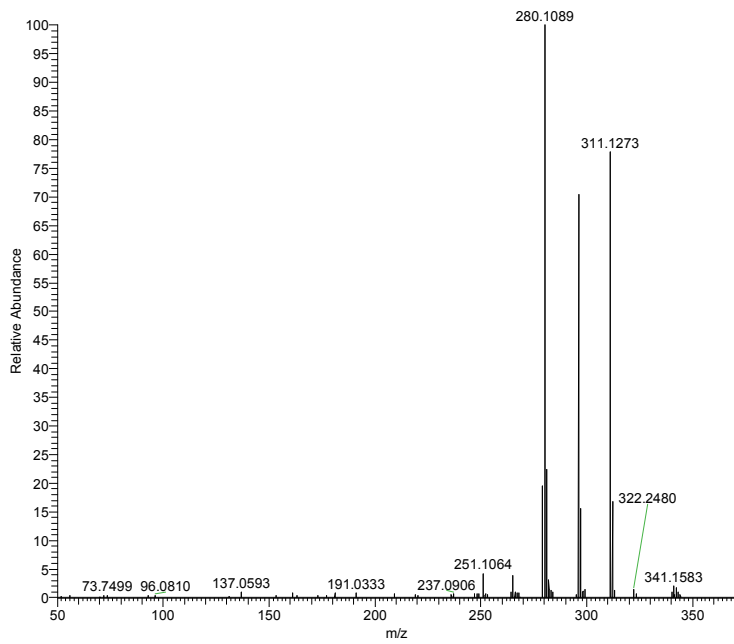



- Corytuberine/isoboldine
  - Retention time of 3.91 min

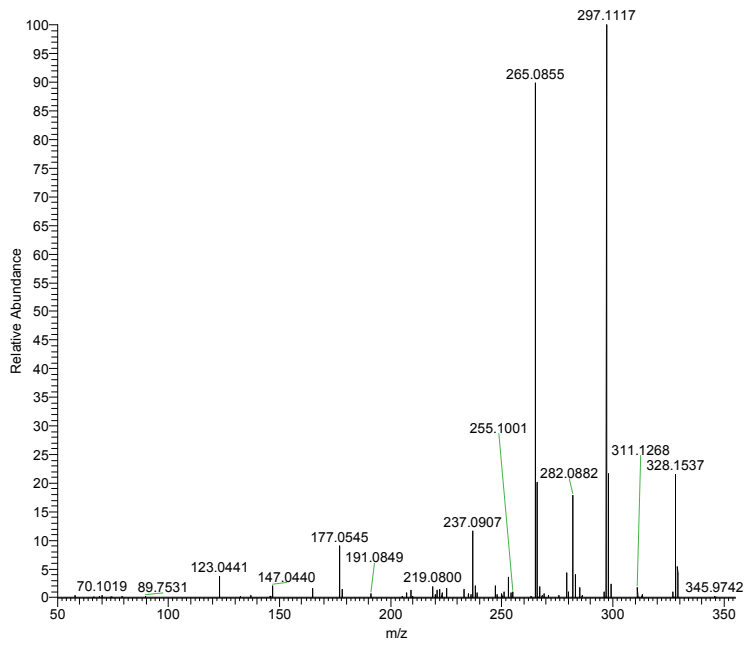

- Retention time of 4.27 min

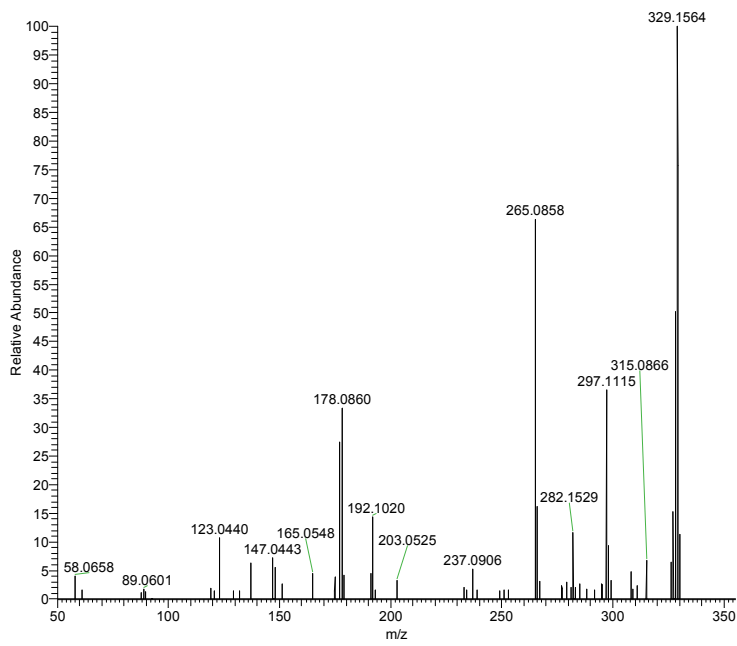

• Ocoteine

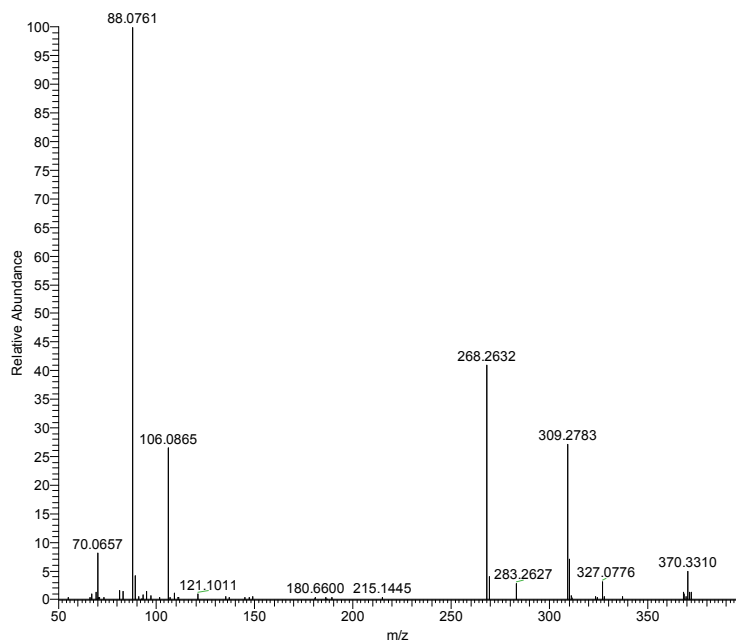

• Coclaurine

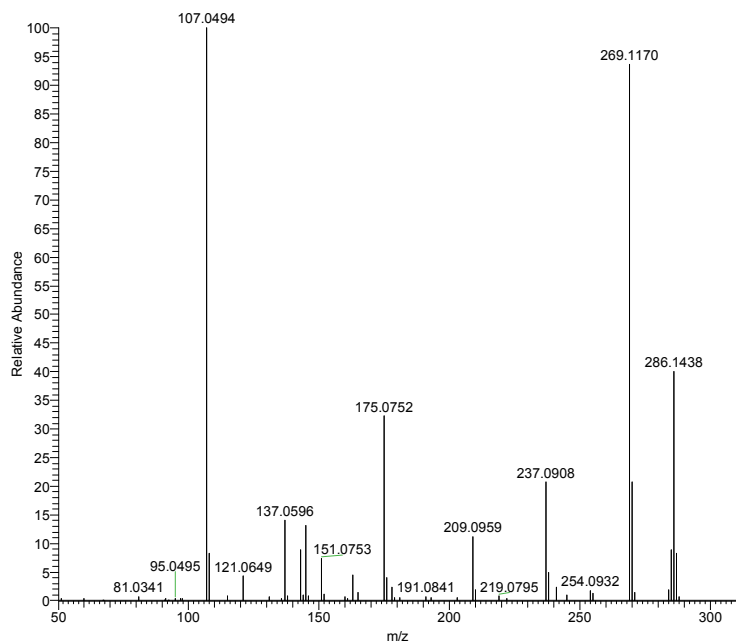

• Norisoboldine

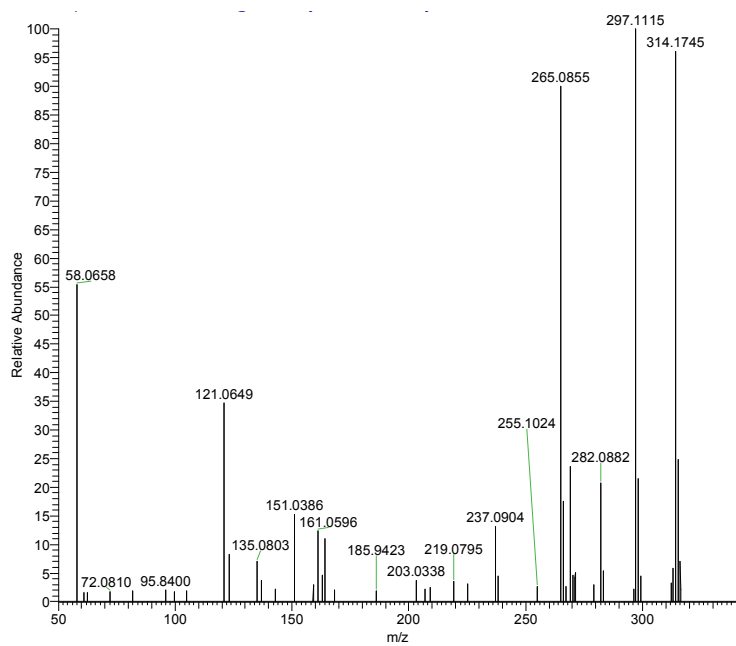

Supplement: c9ra10436d1.pdf [file c9ra10436d1.pdf]
